# Supplementary material
Source: PubMed Central journal article supplement (PMC3878713)
Supplement: CJN.12281211_CJN12281211SupplementaryData1.pdf [file CJN.12281211_CJN12281211SupplementaryData1.pdf]

## Supplemental Materials

### Summary of patients included in the analysis

2368 patients randomized

131 deaths by 2 years

109 drop-outs/ non-compliers by 2 years

151 had no baseline creatinine or urine

178 did not have > 2 annual creatinine and urine

81 were randomized in year 2001- 3 (excluded from primary analysis due to missing follow-up creatinine at year 2 and 30)

**1799** patients with type 2 diabetes mellitus are included in the analysis.

**Supplementary Table 1: Baseline comparison of patients included in renal analysis compared with those who were not included in the analysis.**

| Characteristic                                   | In renal analysis (N=1799) | Not in renal analysis (N=569) | P Value |
|--------------------------------------------------|----------------------------|-------------------------------|---------|
| Age at study entry, mean, SD                     | 62.0, 8.7                  | 63.5, 9.6                     | 0.0016  |
| Male, %                                          | 71.2                       | 67.8                          |         |
| Race/Ethnicity, %                                |                            |                               |         |
| Non Hispanic White                               | 66.7                       | 63.3                          | <0.001  |
| Non Hispanic Black                               | 15.5                       | 21.1                          |         |
| Hispanic                                         | 12.3                       | 13.4                          |         |
| Asian                                            | 5.0                        | 1.6                           |         |
| Other                                            | 0.6                        | 0.7                           |         |
| BMI, mean, SD                                    | 31.6, 5.8                  | 32.3, 6.5                     | 0.0192  |
| COPD, %                                          | 3.6                        | 9.6                           | <0.001  |
| History of MI, %                                 | 32.3                       | 31.2                          |         |
| Sitting systolic BP, mean, SD                    | 131.5, 20.4                | 132.3, 18.7                   |         |
| Sitting diastolic BP mean, SD                    | 74.8, 11.3                 | 73.7, 10.9                    | 0.0598  |
| Core: HbA1c %, mean, SD                          | 7.7, 1.6                   | 7.6, 1.6                      |         |
| Serum creatinine mg/dl, median, IQR              | 1.0 (0.9 – 1.2)            | 1.0 (0.8 – 1.2)               | 0.0519  |
| Urine albumin/creatinine ratio mg/g, median, IQR | 11.7, (5.1 – 43.5)         | 17.9, (6.5 – 78.1)            | <0.001  |
| eGFR, mean, SD                                   | 76.6, 20.1                 | 73.9, 21.3                    | 0.0175  |
| Duration of DM, median, IQR                      | 8.3, (3.6 – 15.0)          | 9.5, (4.1 – 16.3)             | 0.0363  |
| Metformin Use, %                                 | 55.6                       | 48.8                          | 0.0043  |
| TZD Use, %                                       | 18.4                       | 20.3                          |         |
| Currently taking insulin, %                      | 25.7                       | 34.9                          | <0.001  |
| Sulfonylurea, %                                  | 55.1                       | 47.9                          | 0.0026  |

**Supplementary Table 2. Yearly Progression of ACR in Patients with Low Normal Albuminuria in IS vs. IP**

| ACR Category                      | Baseline<br>N = 818 |             | Year 1<br>N = 623 |              | Year 2<br>N=693 |              | Year 3<br>N = 721 |              | Year 4<br>N = 608 |              | Year 5<br>N = 392 |              |
|-----------------------------------|---------------------|-------------|-------------------|--------------|-----------------|--------------|-------------------|--------------|-------------------|--------------|-------------------|--------------|
|                                   | IS<br>n=421         | IP<br>n=397 | IS<br>n=367       | IP<br>n=256  | IS<br>n=369     | IP<br>n=324  | IS<br>n=366       | IP<br>n=355  | IS<br>n=304       | IP<br>n=304  | IS<br>n=192       | IP<br>n=200  |
| <b>Low Normal<br/>0-10 mg/g</b>   | 421<br>100%         | 397<br>100% | 252<br>68.7%      | 202<br>78.9% | 236<br>64.0%    | 237<br>73.2% | 234<br>63.9%      | 257<br>72.4% | 189<br>62.2%      | 217<br>71.4% | 121<br>63.0%      | 134<br>67.0% |
| <b>High Normal<br/>10-30 mg/g</b> | --                  | --          | 84<br>22.9%       | 40<br>15.6%  | 98<br>26.6%     | 70<br>21.6%  | 87<br>23.8%       | 70<br>19.7%  | 68<br>22.4%       | 61<br>20.1%  | 45<br>23.4%       | 52<br>26.0%  |
| <b>Micro<br/>30-300 mg/g</b>      | --                  | --          | 30<br>8.2%        | 14<br>5.5%   | 33<br>8.9%      | 17<br>5.3%   | 43<br>11.8%       | 27<br>7.6%   | 45<br>14.8%       | 24<br>7.9%   | 26<br>13.5%       | 14<br>7.0%   |
| <b>Macro<br/>300+</b>             | --                  | --          | 1<br>0.27%        | 0<br>0.0%    | 2<br>0.5%       | 0<br>0.0%    | 2<br>0.6%         | 1<br>0.3%    | 2<br>0.7%         | 2<br>0.7%    | 0<br>0.0%         | 0<br>0.0%    |

**Supplementary Table 3: Sensitivity analyses based on completeness of data: Number (%) of patients characterized by completeness of data available and ACR progression in IS vs. IP in subgroups based on completeness of data**

|                                                | <b>N= 1799 with at least 2 follow up visits</b> | <b>IS vs. IP Odds Ratio</b> | <b>95% CI</b> | <b>P Value</b> |
|------------------------------------------------|-------------------------------------------------|-----------------------------|---------------|----------------|
| <b>Complete (all measures until study end)</b> | 996 (55%)                                       | 1.37                        | 1.001 – 1.88  | 0.049          |
| <b>Partially complete (sporadic missing)</b>   | 747 (41.5%)                                     | 1.94                        | 1.31 – 2.88   | 0.001          |
| <b>Drop-outs (death, inactivation)</b>         | 56(7.5%)                                        | 0.79                        | 0.18 – 3.43   | 0.75           |

The *P* Value for the interaction between Randomized treatment and completion status is 0.27.  
 Model also includes Cardiac randomization assignment, baseline eGFR, baseline ACR, and year of follow-up

**Supplementary Table 4a. ACR progression in IS vs. IP utilizing all available urines collected including those during years 2002, 2003 when serum creatinine was not available on all subjects (N = 1849).**

| <b>ACR cutoff points</b>      | <b>OR</b> | <b>95% CI</b> | <b>P Value</b> |
|-------------------------------|-----------|---------------|----------------|
| Standard cutoff points        | 1.25      | 0.97 – 1.60   | 0.079          |
| 4 category cutoff points      | 1.38      | 1.11 – 1.71   | 0.0043         |
| Gender specific cutoff points | 1.51      | 1.19 – 1.92   | <0.001         |

Odds ratios (OR's) for progression of albuminuria using different cutoff points for micro and macro albuminuria are shown. The standard cutoff point shows the OR for albumin/creatinine ratio (ACR) progression in IS treated patients when ACR progression is defined as a doubling of ACR to at least 100 mg/g, or a change in category (normal to microalbuminuria ( $\geq 30$  mg/g), micro to macroalbuminuria ( $\geq 300$  mg/g)).

The 4 category model includes the additional categories of low normal (<10 mg/g) and high normal (10-29.9 mg/g) albuminuria as well as micro and macroalbuminuria.

The Third row shows the OR for ACR progression using gender specific cutoff points for albuminuria (microalbuminuria 17-250 mg/g for men; 25-355 mg/g for women).

Covariates in this model of ACR progression include cardiac randomization, baseline ACR, baseline EGFR and indicator for follow-up year.

**Table 4b. Multivariable Models: Odds ratios for progression of albuminuria in IS compared to IP utilizing all available urines collected including those during years 2002, 2003 when serum creatinine was not available on all subjects (N = 1849).**

| <b>ACR cutoff points</b>      | <b>OR</b> | <b>95% CI</b> | <b>P Value</b> |
|-------------------------------|-----------|---------------|----------------|
| Standard cutoff points        | 1.38      | 1.07 – 1.79   | 0.013          |
| 4 category cutoff points      | 1.50      | 1.20 – 1.88   | <0.001         |
| Gender specific cutoff points | 1.65      | 1.29 – 2.10   | < 0.001        |

These models are adjusted for cardiac randomization, baseline ACR, baseline EGFR and indicator for follow-up year, race/ethnicity, sex, baseline factors of diabetes duration, BMI, Systolic and diastolic BP, COPD, insulin use, smoking status, triglycerides, HDL, LDL, and concurrent ace/ARB use and HbA1c.
