# Supplementary material
Source: PubMed Central journal article supplement (PMC3878713)
Supplement: CJN.12281211_CJN12281211SupplementaryData2.pdf [file CJN.12281211_CJN12281211SupplementaryData2.pdf]

Phyllis August,<sup>\*</sup> Regina M. Hardison,<sup>†</sup> Fadi G.Hage,<sup>‡</sup> Oscar C. Marroquin,<sup>†§</sup> Janet B. McGill,<sup>||</sup> Yves Rosenberg,<sup>¶</sup> Michael Steffes,<sup>\*\*</sup> Barry M. Wall,<sup>††</sup> and Mark Molitch,<sup>‡‡</sup> for the BARI 2D Study Group

<sup>\*</sup>Division of Nephrology and Hypertension, New York Presbyterian–Weill Cornell Medical Center, Lang Center for Research and Education, New York Hospital Queens, Flushing, New York;

<sup>†</sup>Department of Medicine, University of Pittsburgh, Pittsburgh, Pennsylvania;

<sup>‡</sup>Division of Cardiovascular Disease, Department of Medicine, University of Alabama at Birmingham/Birmingham Veterans Affairs Medical Center, Birmingham, Alabama;

<sup>§</sup>Heart and Vascular Institute, University of Pittsburgh Medical Center, Pittsburgh, Pennsylvania;

<sup>||</sup> Division of Endocrinology, Metabolism and Lipid Research, Washington University/Barnes Jewish Hospital, St. Louis, Missouri;

<sup>¶</sup>Division of Cardiovascular Sciences, National Heart, Lung, and Blood Institute, National Institutes of Health, Bethesda, Maryland;

<sup>\*\*</sup>Department of Laboratory Medicine and Pathology, University of Minnesota, Minneapolis, Minnesota;

<sup>††</sup>Division of Nephrology, Memphis Veterans Affairs Medical Center/University of Tennessee Health Science Center, Memphis, Tennessee; and

<sup>‡‡</sup>Division of Endocrinology, Metabolism and Molecular Medicine, Department of Medicine, Northwestern University Feinberg School of Medicine, Chicago, Illinois
